# Supplementary material for: Modelling hCDKL5 Heterologous Expression in Bacteria
Source: Metabolites. 2021 Jul 28;11(8):491. doi: 10.3390/metabo11080491 (PMC8401935; doi:10.3390/metabo11080491)
Supplement: Supplementary file 1 [file metabolites-11-00491-s001.zip]

Archive with 4 entries (4 files):
- Chapter 14_ Tutino_REVISED 04_11_2020 final.pdf
- __MACOSX/._Chapter 14_ Tutino_REVISED 04_11_2020 final.pdf
- Supplementary_information_S1_CDKL5.pdf
- __MACOSX/._Supplementary_information_S1_CDKL5.pdf
